# Supplementary material for: A manganese-doped polymeric framework of polyoxotitanate nanoclusters with a narrow band gap
Source: Royal Society of Chemistry journal article supplement (doi:10.1039/c3dt52218k), 2013-01-01
Supplement: c3dt52218k.pdf [file c3dt52218k.pdf]

# Supporting Information

## **A manganese-doped polymeric framework of polyoxotitanate nanoclusters with a narrow band gap**

Yang Chen,\* Jesse D. Sokolow, Elzbieta Trzop and Philip Coppens\*

Chemistry Department, University at Buffalo, SUNY, Buffalo, New York 14260-3000, United States.

E-mail: coppens@buffalo.edu; ychen37@buffalo.edu

## Experimental Section

All of the reagents and solvent were purchased from commercial sources: Titanium(IV) ethoxide (99+%) was purchased from Alfa Aesar; Manganese(II) bromide tetrahydrate, 1,1,1-Tris(hydroxymethyl)ethane (99%), and ethanol (200 proof, anhydrous,  $\geq 99.5\%$ ) were purchased from ALDRICH. The compounds containing titanium were stored and handled in a glove-box under a nitrogen atmosphere.

Synthesis of  $\{\text{Ti}_{13}\text{Mn}_4\text{O}_{16}[\text{CH}_3\text{C}(\text{CH}_2\text{O})_3]_4(\text{OEt})_{12}\text{Br}_4\}_\infty$ :

To a Teflon-lined Parr bomb with a 23 mL capacity was loaded Titanium(IV) ethoxide (684.3 mg, 3.0 mmol), 1,1,1-Tris(hydroxymethyl)ethane (120.2 mg, 1.0 mmol), Manganese(II) bromide tetrahydrate (143.4 mg, 0.5 mmol), and ethanol (5.0 mL). The resulting mixture was stirred for 5 minutes and sealed. The reactor was heated in an oven to 150 °C for 72 hours and then cooled to 40 °C over 48 hours. After the oven was totally cooled to the room temperature, the yellow block crystals of  $\{\text{Ti}_{13}\text{Mn}_4\text{O}_{16}[\text{MeC}(\text{CH}_2\text{O})_3]_4(\text{OEt})_{12}\text{Br}_4\}_\infty$  were taken out from the Parr bomb, and washed with ethanol and dried in the glove-box. Yield: 26.1 mg (8.6% based on Mn). Elemental analysis calcd (%) for  $\text{C}_{44}\text{H}_{96}\text{O}_{40}\text{Br}_4\text{Mn}_4\text{Ti}_{13}$ : C 21.78, H 3.99; found: C 21.68, H 3.92.

**Table S1.** Crystal data and details of data collection and refinement for  $\{\text{Ti}_{13}\text{Mn}_4\text{O}_{16}[\text{MeC}(\text{CH}_2\text{O})_3]_4(\text{OEt})_{12}\text{Br}_4\}_\infty$

| Compound                                 | $\{\text{Ti}_{13}\text{Mn}_4\text{O}_{16}[\text{MeC}(\text{CH}_2\text{O})_3]_4(\text{OEt})_{12}\text{Br}_4\}_\infty$ |
|------------------------------------------|----------------------------------------------------------------------------------------------------------------------|
| Chemical formula                         | $\text{C}_{44}\text{H}_{96}\text{O}_{40}\text{Br}_4\text{Mn}_4\text{Ti}_{13}$                                        |
| Formula weight                           | 2426.88                                                                                                              |
| Crystal system                           | Tetragonal                                                                                                           |
| Space group                              | $I4_1md$                                                                                                             |
| $a / \text{Å}$                           | 34.8012(10)                                                                                                          |
| $b / \text{Å}$                           | 34.8012(10)                                                                                                          |
| $c / \text{Å}$                           | 14.7872(6)                                                                                                           |
| $V / \text{Å}^3$                         | 17909.1(10)                                                                                                          |
| $Z$                                      | 8                                                                                                                    |
| $T / \text{K}$                           | 90(2)                                                                                                                |
| $F(000)$                                 | 9647                                                                                                                 |
| $\mu$ (Mo $K\alpha$ , $\text{mm}^{-1}$ ) | 3.490                                                                                                                |
| Total reflections                        | 9472                                                                                                                 |
| Unique reflections                       | 4957                                                                                                                 |
| No. of parameters                        | 485                                                                                                                  |
| $R^a$                                    | 0.0545                                                                                                               |
| $\omega R^b$                             | 0.1579                                                                                                               |
| $GOF^c$                                  | 1.043                                                                                                                |

<sup>a</sup> $R = \sum ||F_o| - |F_c|| / \sum |F_o|$ . <sup>b</sup> $\omega R = \{\sum w(F_o^2 - F_c^2)^2 / \sum w(F_o^2)^2\}^{1/2}$ . <sup>c</sup> $GOF = \{\sum [w((F_o^2 - F_c^2)^2) / (n-p)]\}^{1/2}$ , where  $n$  = number of reflections and  $p$  = total numbers of parameters refined.

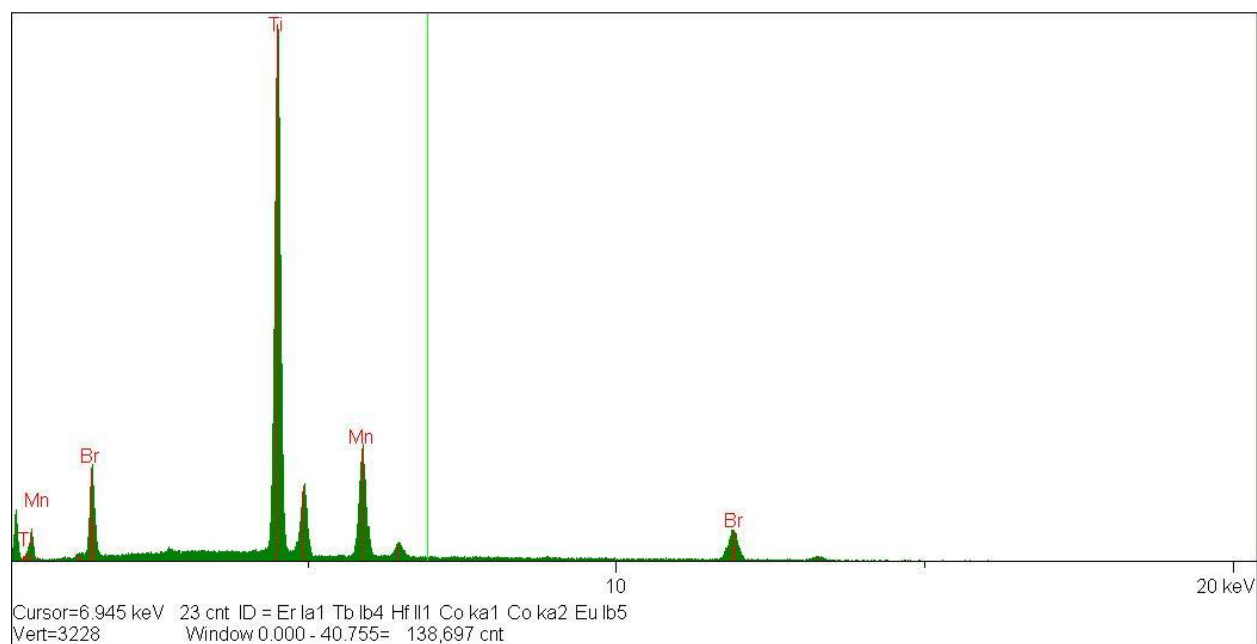

**Fig. S1** EDS spectrum of  $\{\text{Ti}_{13}\text{Mn}_4\text{O}_{16}[\text{MeC}(\text{CH}_2\text{O})_3]_4(\text{OEt})_{12}\text{Br}_4\}_\infty$ .

| El. | Line | Intensity<br>(c/s) | Error<br>2-sig | Atomic<br>% | Conc    | Units |
|-----|------|--------------------|----------------|-------------|---------|-------|
| Ti  | Ka   | 1,593.07           | 16.337         | 62.943      | 54.902  | wt.%  |
| Mn  | Ka   | 370.71             | 8.168          | 19.470      | 19.491  | wt.%  |
| Br  | Ka   | 131.11             | 5.020          | 17.587      | 25.607  | wt.%  |
|     |      |                    |                | 100.000     | 100.000 | wt.%  |
|     |      |                    |                |             |         | Total |

KV 30.0  
Takeoff Angle 45.0°  
Elapsed Livetime 25.0
